# Supplementary material for: Evaluation of Sporicidal Disinfectants for the Disinfection of Personal Protective Equipment During Biological Hazards
Source: PubMed Central journal article supplement (PMC7047094; doi:10.1089/hs.2019.0128), 2020-02-17
Supplement: Supp_FigS1-S2.pdf [file Supp_FigS1-S2.pdf]

## Supplemental Material

Figure S1 and S2. Visualization of PPE material surfaces by scanning electron microscopy. TESIMAX<sup>®</sup> S3 PE-T (Figure S1) and TESIMAX<sup>®</sup> SYKAN 2 (Figure S2) were analyzed before and after UV radiation (4 J/cm<sup>2</sup>), or treatment with Hypochlorit-CA G/0.5% Alcapur<sup>®</sup> (2.5% chlorine), Wofasteril<sup>®</sup> SC super/1.5% Alcapur<sup>®</sup> (2.75% peracetic acid), or Wofasteril<sup>®</sup>/0.5% Alcapur<sup>®</sup> N (2% peracetic acid) for 10 minutes. TESIMAX<sup>®</sup> S3 PE-T shows a smooth surface, which is, in the case of the chemically treated samples, regionally covered by a thin layer of material not present in untreated controls. It is of note that this additional material shows cracks but the PPE material surface does not. TESIMAX<sup>®</sup> SYKAN 2 reveals a more granular surface with tiny holes (smaller than 5 µm maximum diameter) in the upper layers of the surface, which is not significantly impaired by UV or treatment with the disinfectants.

**A** untreated

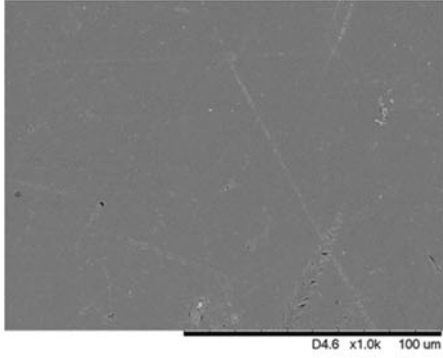

UV radiation (4 J/cm<sup>2</sup>)

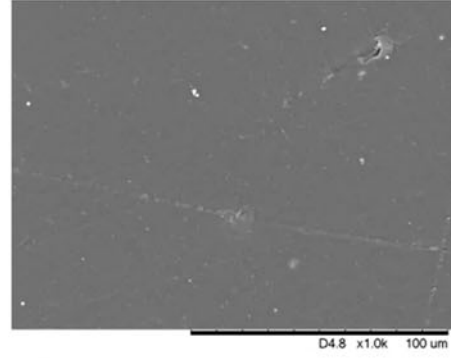

**B** Hypochlorit-CA G / 0.5% Alcapur<sup>®</sup> (2.5% chlorine)

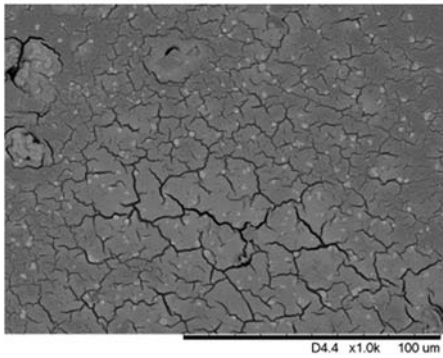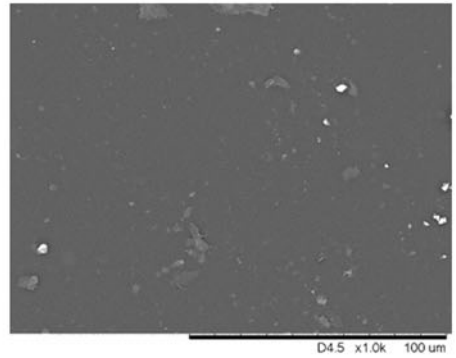

**C** Wofasteril<sup>®</sup> SC super / 1.5% Alcapur<sup>®</sup> (2.75% peracetic acid)

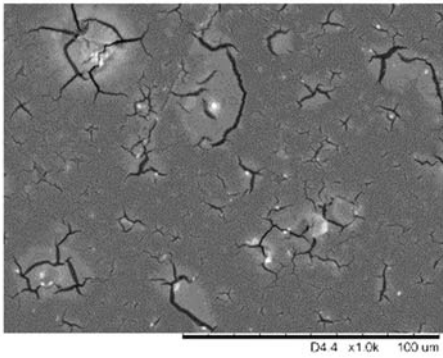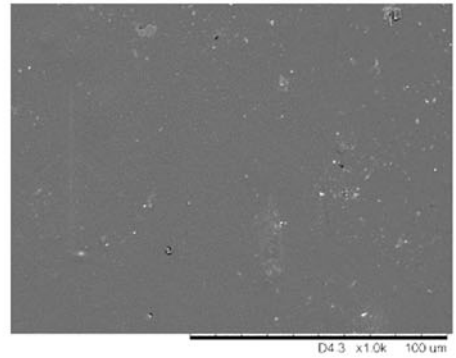

**D** Wofasteril<sup>®</sup> / 1.5% Alcapur<sup>®</sup> N (2% peracetic acid)

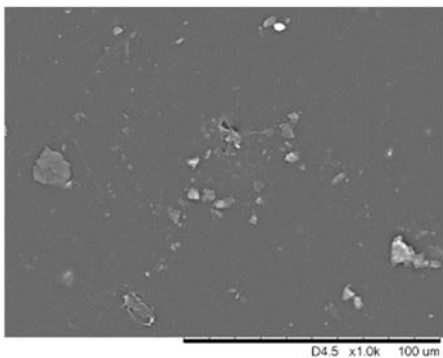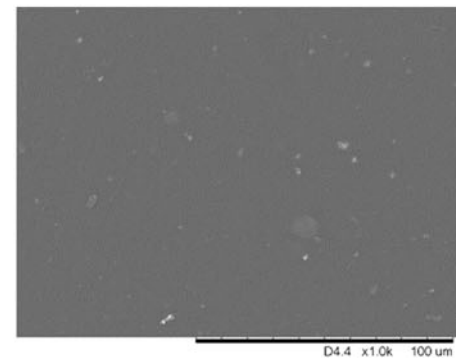

Supplementary Figure S1.

**A untreated**

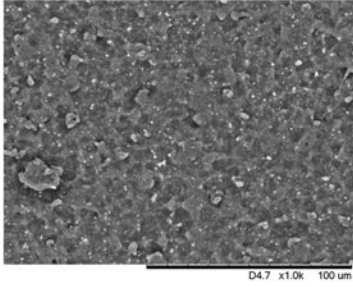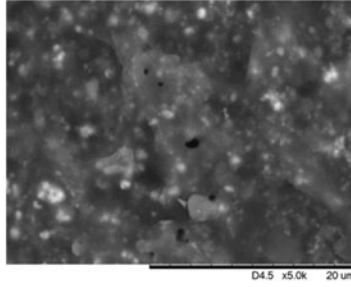

**UV radiation (4 J/cm<sup>2</sup>)**

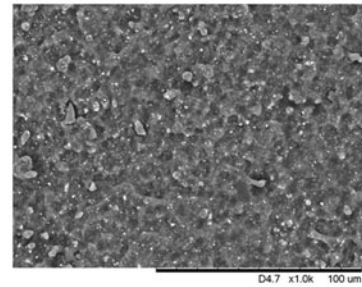

**B Hypochlorit-CA G / 0.5% Alcapur<sup>®</sup> (2.5% chlorine)**

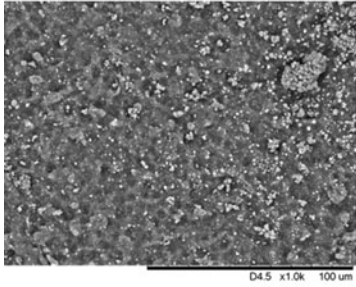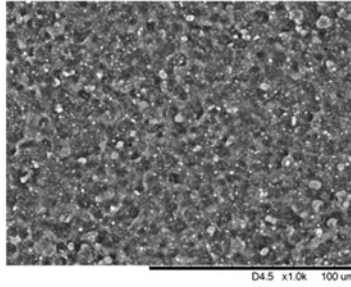

**C Wofasteril<sup>®</sup> SC super / 1.5% Alcapur<sup>®</sup> (2.75% peracetic acid)**

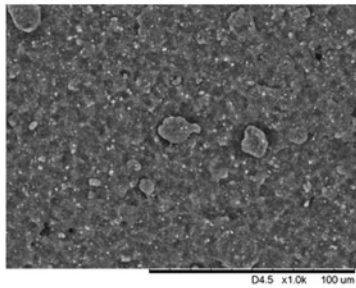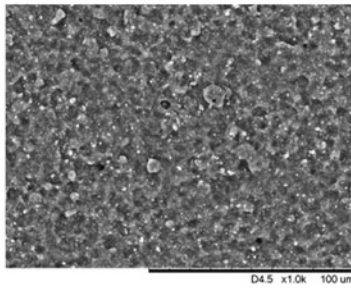

**D Wofasteril<sup>®</sup> / 1.5% Alcapur<sup>®</sup> N (2% peracetic acid)**

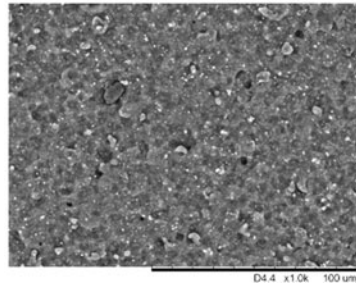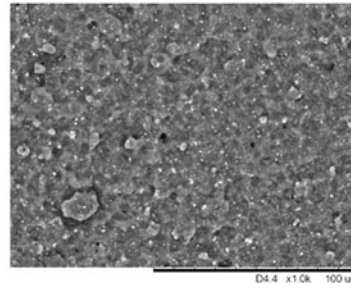

Supplementary Figure S2.
